# Supplementary material
Source: PubMed Central journal article supplement (PMC1450211)

## Replication

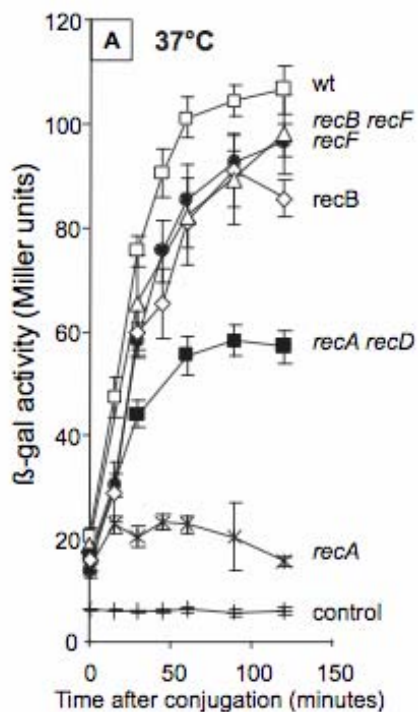

## Recombination

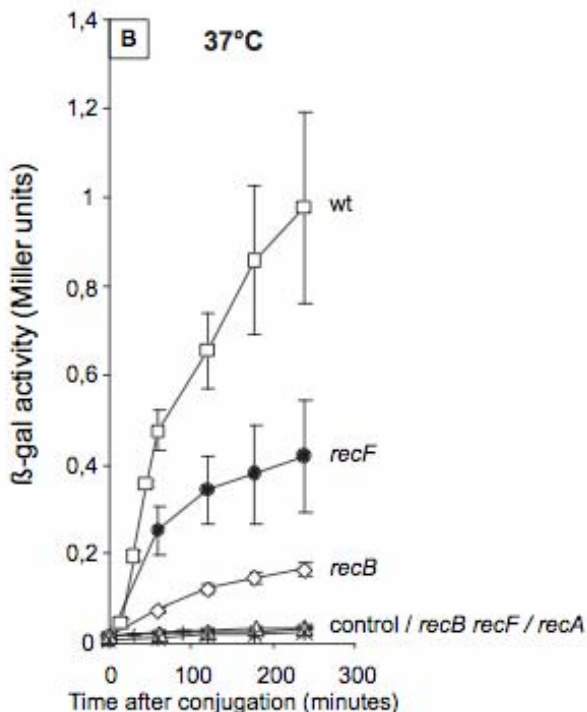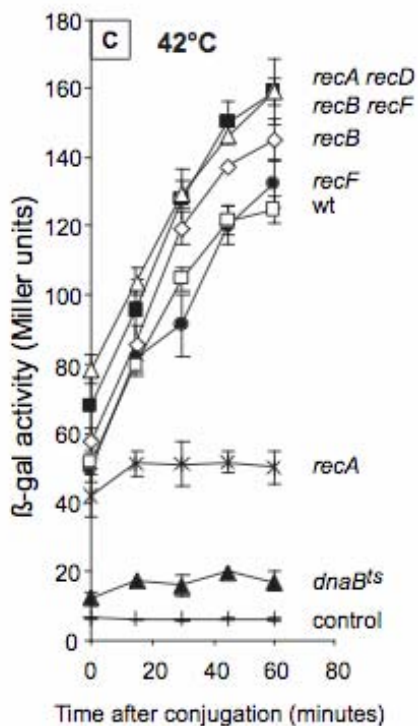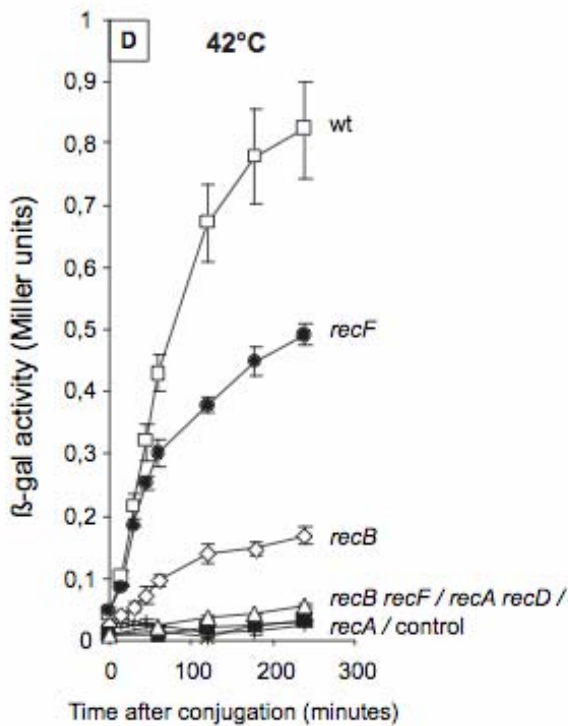

Supplement: pnas_0509012103_1.pdf [file pnas_0509012103_1.pdf]

## Replication

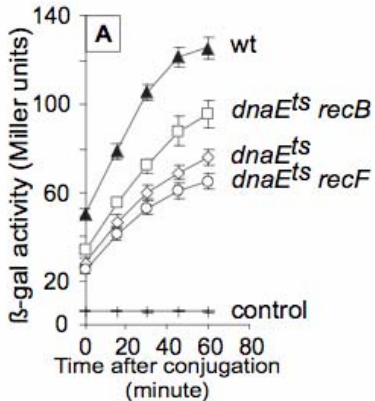

## Recombination

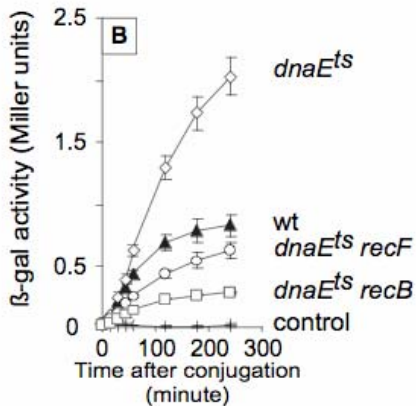

Supplement: pnas_0509012103_2.pdf [file pnas_0509012103_2.pdf]

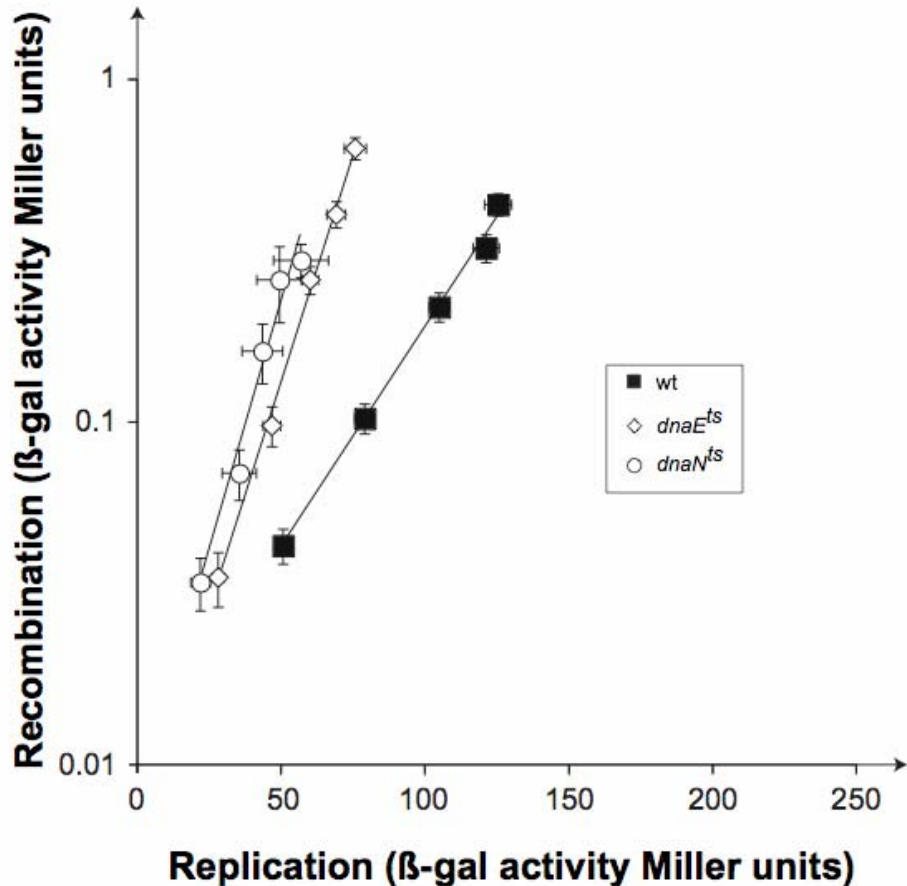

Supplement: pnas_0509012103_3.pdf [file pnas_0509012103_3.pdf]
